# Supplementary material for: The Malaria System MicroApp: A New, Mobile Device-Based Tool for Malaria Diagnosis
Source: PubMed Central journal article supplement (PMC5424126; doi:10.2196/resprot.6758), 2017-04-25
Supplement: resprot_v6i4e70_app1.pdf [file resprot_v6i4e70_app1.pdf]

Multimedia Appendix. Screenshot of the Malaria System app beta version.

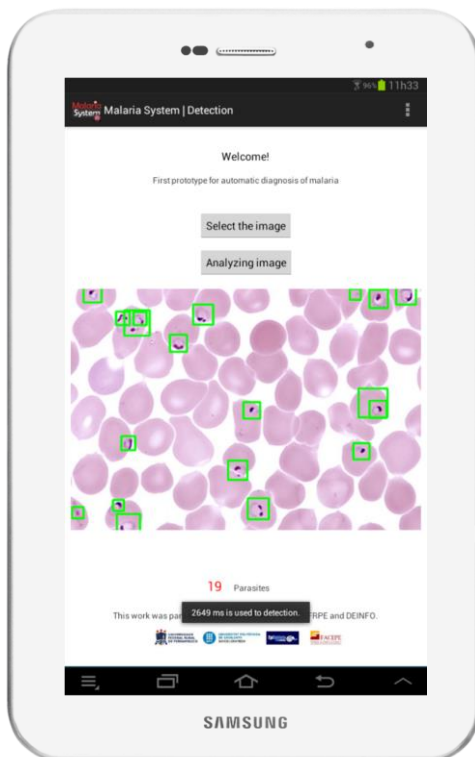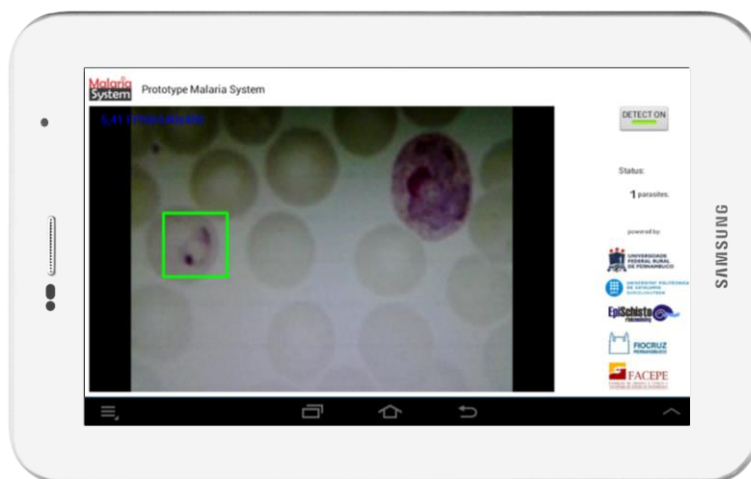

This is a Multimedia Appendix to a full manuscript published in the JMIR Research Protocols, for full copyright and citation information see <http://dx.doi.org/10.2196/resprot.6758>.
